# Supplementary material for: Boosting CO2 electroreduction to CO with abundant nickel single atom active sites
Source: Royal Society of Chemistry journal article supplement (doi:10.1039/d1qi00126d), 2021-01-01
Supplement: d1qi00126d1.pdf [file d1qi00126d1.pdf]

**Electronic Supplementary Information (ESI) for Inorganic Chemistry Frontiers**

**Boosting CO<sub>2</sub> electroreduction to CO with abundant nickel single atom active sites**

Wei-juan Wang<sup>a</sup>, Changsheng Cao<sup>b</sup>, Kaiwen Wang<sup>c\*</sup> and Tianhua Zhou<sup>b</sup>

<sup>a</sup> College of Chemistry, Fuzhou University, Fuzhou, Fujian 350108, P. R. China.

<sup>b</sup> State Key Laboratory of Structural Chemistry, Fujian Institute of Research on the Structure of Matter, Chinese Academy of Sciences (CAS), Fuzhou 350002, China.

<sup>c</sup> Beijing Key Lab of Microstructure and Properties of Advanced Materials, Beijing University of Technology, Beijing 100124, P. R. China.

\*Corresponding authors at:

Beijing Key Lab of Microstructure and Properties of Advanced Materials

Beijing University of Technology, Beijing 100124, P. R. China

Tel: +86 18811419320

E-mail address: [56wkw@emails.bjut.edu.cn](mailto:56wkw@emails.bjut.edu.cn)

## Contents

**Figure S1.** SEM images of Ni-TIPA.

**Figure S2.** (a) TEM image of Ni-SAs-NC. (b, c) Magnified HAAD-STEM images of Ni-SAs-NC.

**Figure S3.** (a-c) TEM images of Ni-NPs-NC. (d) STEM image of Ni-NPs-NC. (e, f) TEM images of NC.

**Figure S4.** Raman spectra of Ni-SAs-NC, NC and Ni-NPs-NC.

**Figure S5.** (a) Nitrogen adsorption-desorption isotherms for Ni-SAs-NC, NC and Ni-NPs-NC. (b) CO<sub>2</sub> adsorption-desorption isotherms of Ni-SAs-NC, NC and Ni-NPs-NC at 298K.

**Figure S6.** (a) XPS survey spectra of Ni-SAs-NC and Ni-NPs-NC. (b) N 1s XPS spectra of Ni-NPs-NC and Ni-SAs-NC.

**Figure S7.** CV curves with different scan rates for (a) Ni-SAs-NC, (b) Ni-NPs-NC, (c) NC and (d) Capacitive  $\Delta j$  ( $= j_a - j_c$ ) against scan rates.

**Figure S8.** (a, b) Magnified HAAD-STEM images of Ni-SAs-NC after 30-hour electrocatalysis.

**Table S1.** The content of different-type N in Ni-SAs-NC and Ni-NPs-NC.

**Table S2.** EXAFS data fitting results of Ni-SAs-NC for Ni K edge.

**Table S3.** Comparisons the CO<sub>2</sub>RR performance of Ni-SAs-NC with reported Ni-based SACs.

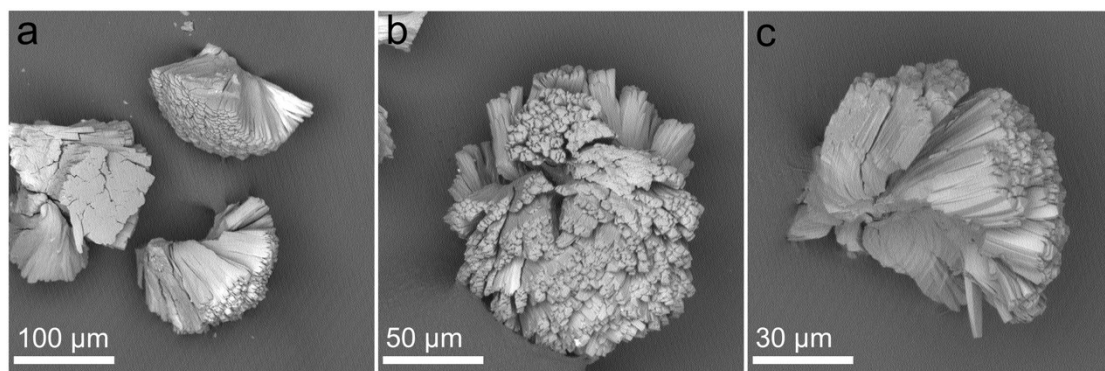

**Figure S1.** SEM images of Ni-TIPA.

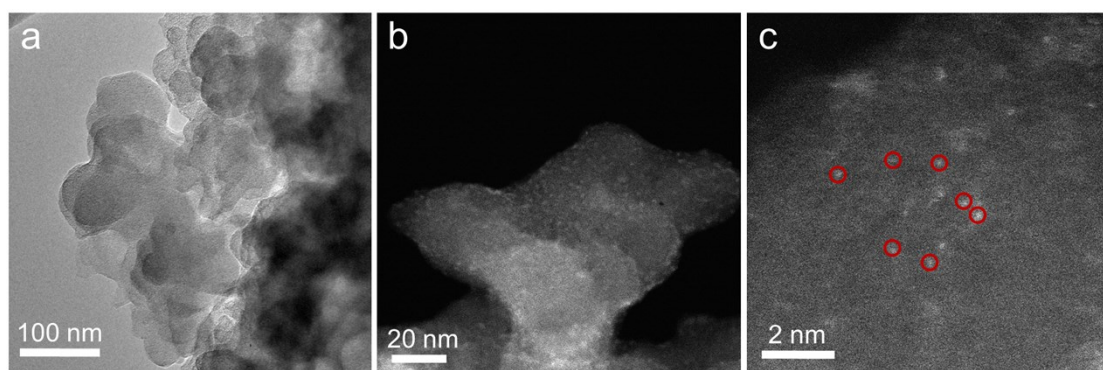

**Figure S2.** (a) TEM image of Ni-SAs-NC. (b, c) Magnified HAAD-STEM images of Ni-SAs-NC.

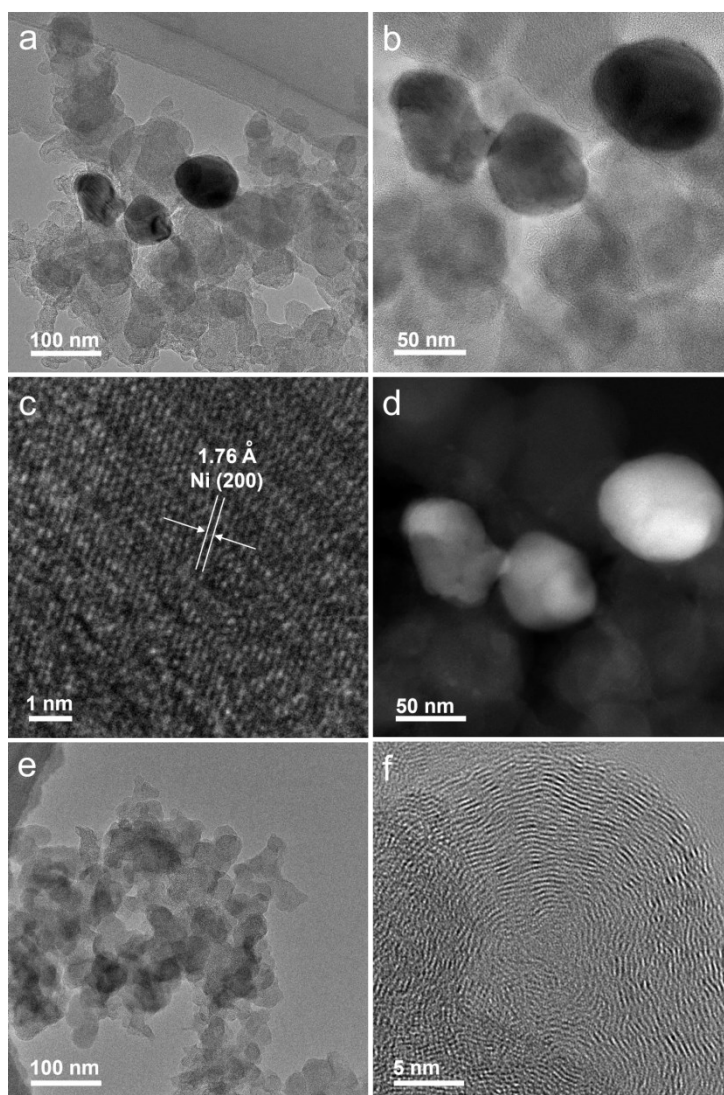

**Figure S3.** (a-c) TEM images of Ni-NPs-NC. (d) STEM image of Ni-NPs-NC. (e, f) TEM images of NC.

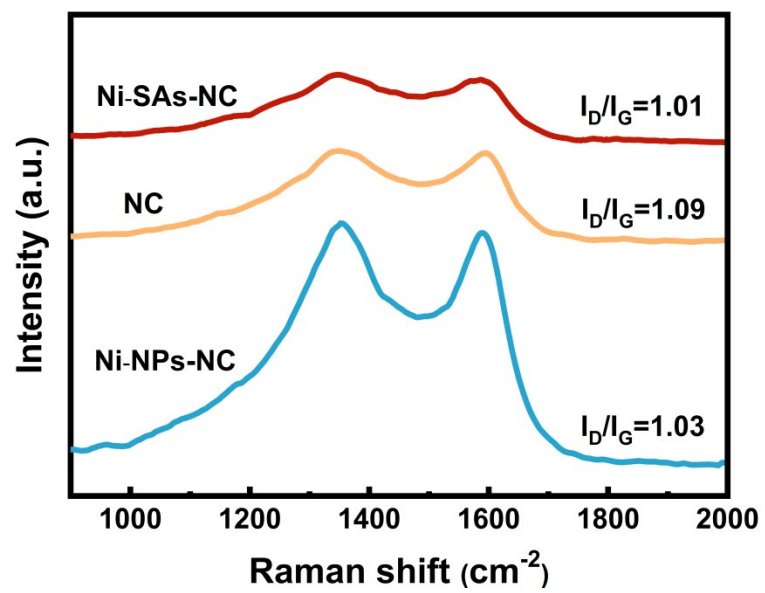

**Figure S4.** Raman spectra of Ni-SAs-NC, NC and Ni-NPs-NC.

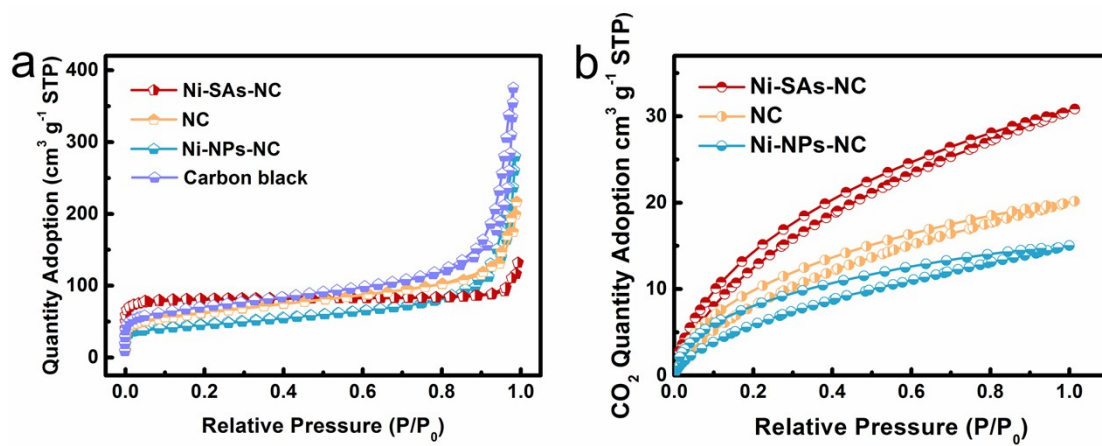

**Figure S5.** (a) Nitrogen adsorption-desorption isotherms for Ni-SAs-NC, NC, Ni-NPs-NC and carbon black. (b) CO<sub>2</sub> adsorption-desorption isotherms of Ni-SAs-NC, NC and Ni-NPs-NC at 298K.

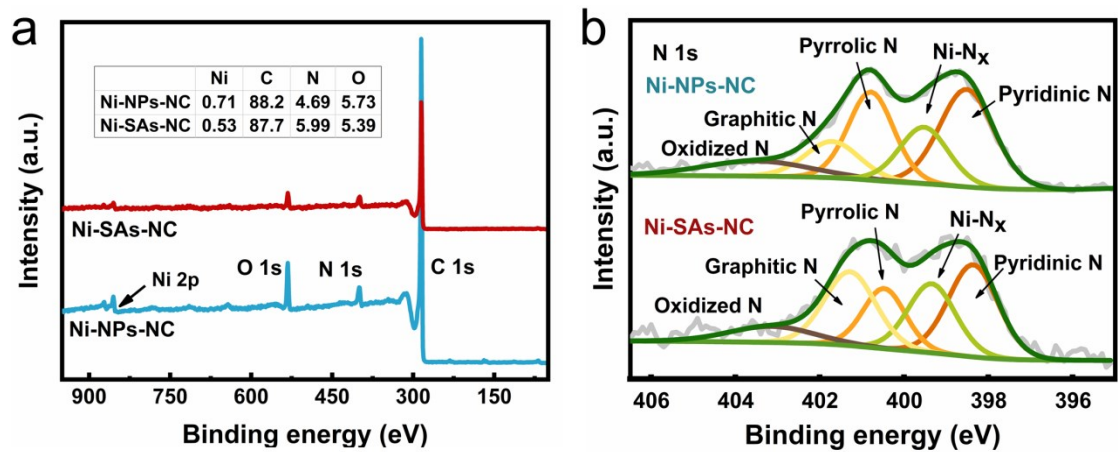



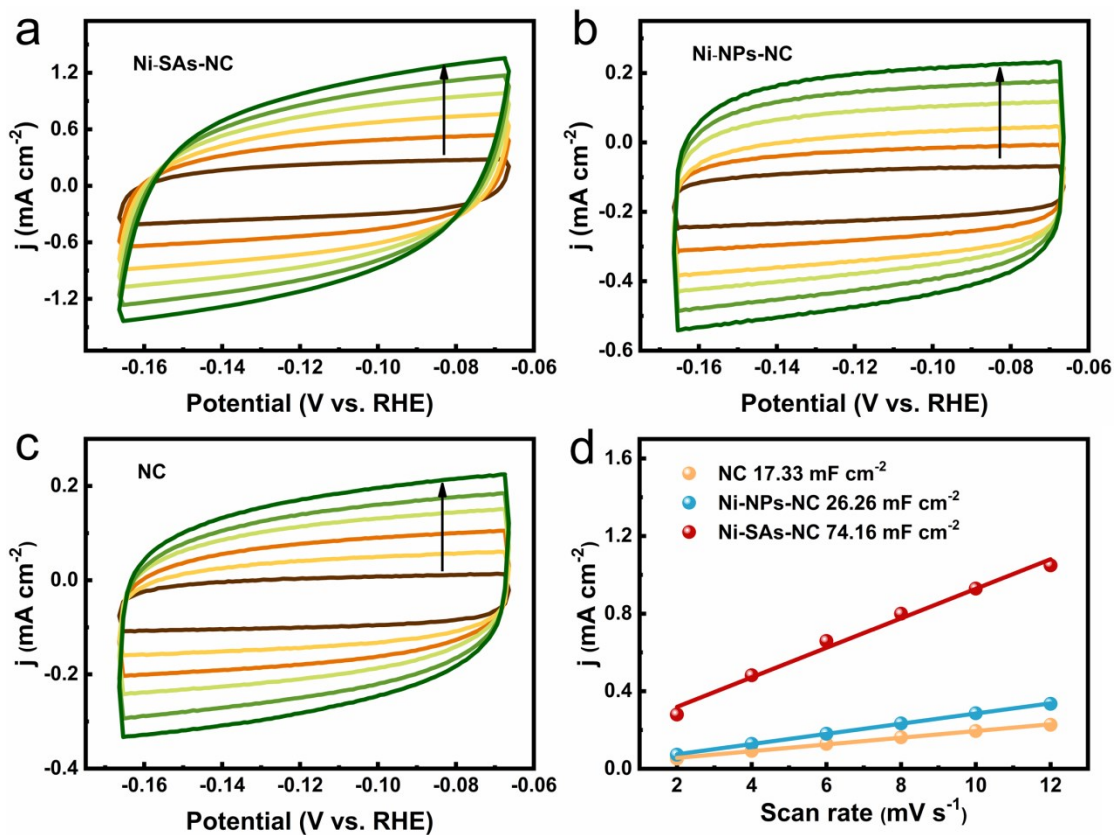

**Figure S7.** CV curves with different scan rates for (a) Ni-SAs-NC, (b) Ni-NPs-NC, (c) NC and (d) Capacitive  $\Delta j$  ( $= j_a - j_c$ ) against scan rates.

The electrochemically active surface area (ECSA) of the catalysts can be evaluated from the measurements of electrochemical double layer capacitance ( $C_{dl}$ ), since ECSA can be calculated from the formula of  $ECSA = C_{dl}/C_s$ , where  $C_{dl}$  corresponds to the slope of the double-layer current versus the scan rates,  $C_s$  represents a specific capacitance value (20  $\mu\text{F cm}^{-2}$ ).<sup>[1]</sup> Therefore, the electrochemically active surface area of Ni-SAs-NC, Ni-NPs-NC and NC can be calculated of 3708 cm<sup>2</sup>, 1313 cm<sup>2</sup>, 866.5 cm<sup>2</sup>, respectively.

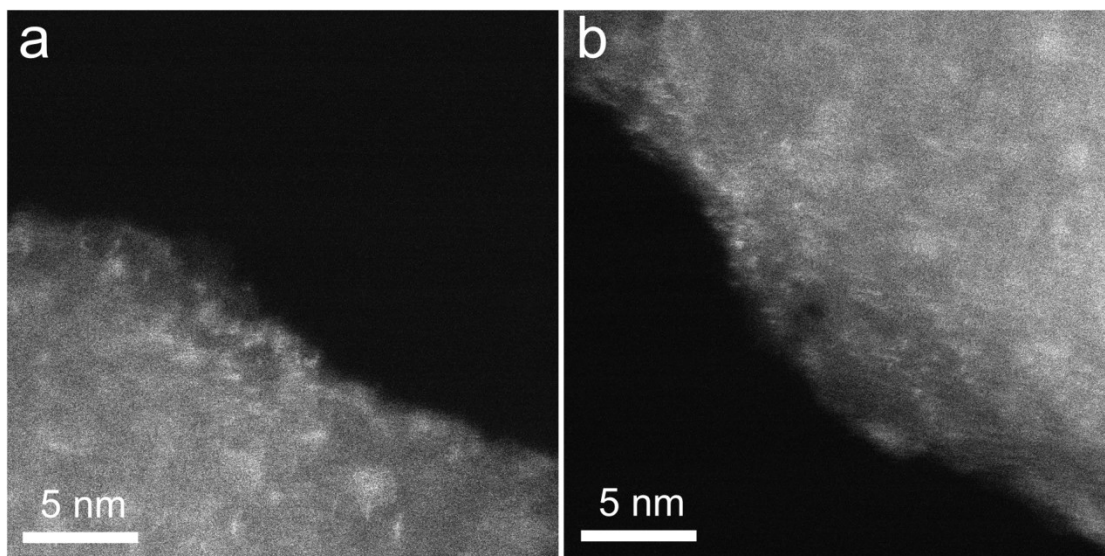

**Figure S8.** (a, b) Magnified HAAD-STEM images of Ni-SAs-NC after 30-hour electrocatalysis.

**Table S1.** The content of different-type N in Ni-SAs-NC and Ni-NPs-NC.

|           | Pyridinic<br>N(%) | Ni-N <sub>x</sub> (%) | Pyrrolic<br>N(%) | Graphitic<br>N(%) | Oxidized<br>N(%) |
|-----------|-------------------|-----------------------|------------------|-------------------|------------------|
| Ni-SAs-NC | 25.7              | 22.4                  | 15.2             | 27.9              | 8.8              |
| Ni-NPs-NC | 33.9              | 12.6                  | 25.6             | 17.6              | 10.3             |

**Table S2.** EXAFS data fitting results of Ni-SAs-NC for Ni K edge.

| Sample  | Scattering pair | CN  | R (Å) | $\sigma^2(10^{-3}\text{Å}^2)$ | $\Delta E0$ (eV) | R factor |
|---------|-----------------|-----|-------|-------------------------------|------------------|----------|
| Ni-T@CB | Ni-N            | 4.0 | 1.97  | 0.00872                       | -4.542           | 0.028    |

**Table S3.** Comparisons the CO<sub>2</sub>RR performance of Ni-SAs-NC with reported Ni-based SACs.

| Catalyst                            | Ni content | FE <sub>CO</sub> (%) | j<br>(mA/cm <sup>2</sup> ) | Overpotential<br>(mV) | Reference                                                           |
|-------------------------------------|------------|----------------------|----------------------------|-----------------------|---------------------------------------------------------------------|
| Ni-SAs-NC                           | 2.0 wt%    | 98                   | 32                         | 540                   | <b>This work</b>                                                    |
| C-Zn1Ni4                            | 5.44 wt%   | 92                   | 70                         | 420                   | <i>Energy Environ. Sci.</i> , <b>2018</b> , <i>11</i> , 1204-1210   |
| Ni-N-C                              | 1.25 wt%   | 91.2                 | 15                         | 790                   | <i>Catal. Sci. Technol.</i> , <b>2019</b> , <i>9</i> , 3669         |
| Ni-C-Gr                             | 2.2 wt%    | 95                   | 3                          | 590                   | <i>Small</i> , <b>2016</b> , <i>12</i> , 6083-6089                  |
| Ni-CNT-CC                           | 0.27 wt%   | 95                   | 95                         | 540                   | <i>Angew. Chem., Int. Ed.</i> , <b>2020</b> , <i>59</i> , 798-803   |
| Ni <sub>SA</sub> -N <sub>2</sub> -C | 0.9 wt%    | 98                   | 26                         | 690                   | <i>Angew. Chem., Int. Ed.</i> , <b>2020</b> , <i>59</i> , 2705-2709 |
| NiN-GS                              | 2 at%      | 95                   | 24                         | 550                   | <i>Chem</i> , <b>2017</b> , <i>3</i> , 950-960                      |
| A-Ni-NSG                            | 2.8 wt%    | 97                   | 95                         | 500                   | <i>Nat. Energy</i> , <b>2018</b> , <i>3</i> , 140-147               |
| NiSA/PCFM                           | 1.3 wt%    | 96                   | 30                         | 590                   | <i>Nat. Commun.</i> , <b>2020</b> , <i>11</i> , 593                 |
| Ni-Fe-N-C                           | 0.97 wt%   | 98                   | 20                         | 590                   | <i>Angew. Chem., Int. Ed.</i> , <b>2019</b> , <i>58</i> , 6972-6976 |
| Ni-NCB                              | 0.27 wt%   | 99                   | 22                         | 571                   | <i>Joule</i> , <b>2019</b> , <i>3</i> , 265-278                     |
| Ni-SAC                              | 1.8 wt%    | 98.9                 | 4                          | 1090                  | <i>Nat. Commun.</i> , <b>2019</b> , <i>1</i> , 4585                 |

## Reference

1. H. B. Yang, S.-F. Hung, S. Liu, K. Yuan, S. Miao, L. Zhang, X. Huang, H.-Y. Wang, W. Cai, R. Chen, J. Gao, X. Yang, W. Chen, Y. Huang, H. M. Chen, C. M. Li, T. Zhang and B. Liu, *Nat. Energy*, 2018, **3**, 140-147.
